# Supplementary material for: Secretion analysis during the invasion process of Salmonella typhimurium into HT-29 intestinal epithelial cells on a microfluidic chip
Source: Royal Society of Chemistry journal article supplement (doi:10.1039/d5an00512d), 2025-01-01
Supplement: d5an00512d1.pdf [file d5an00512d1.pdf]

## Supporting Information

### **Secretion analysis of invading process between *Salmonella typhimurium* and HT-29 intestinal epithelial cells on the microfluidic chip**

Hong He<sup>a,c,d</sup>, Haolan Tan<sup>a,b,d</sup>, Chuang Ge<sup>e</sup>, Yi Xu<sup>a,c,d,\*</sup>

<sup>a</sup> Key Disciplines Lab of Novel Micro-Nano Devices and System Technology, Key Laboratory of Optoelectronic Technology and Systems, Ministry of Education, Chongqing University, Shapingba, Chongqing 400044, China

<sup>b</sup> School of Chemistry and Chemical Engineering, Chongqing University, Shapingba, Chongqing 400044, China

<sup>c</sup> School of Optoelectronic Engineering, Chongqing University, Shapingba, Chongqing 400044, China

<sup>d</sup> International R & D Center of Micro-nano Systems and New Materials Technology, Chongqing University, Shapingba, Chongqing 400044, China

<sup>e</sup> Key Laboratory of Translational Research for Cancer Metastasis and Individualized Treatment, Chongqing University Cancer Hospital, Chongqing 400030, China

\* Corresponding author at: Key Disciplines Lab of Novel Micro-Nano Devices and System Technology, Chongqing University, No. 174, St. Shazhengjie, Shapingba District, Chongqing, 400044, China; E-mail address: [xuyibbd@cqu.edu.cn](mailto:xuyibbd@cqu.edu.cn) (Y. XU)

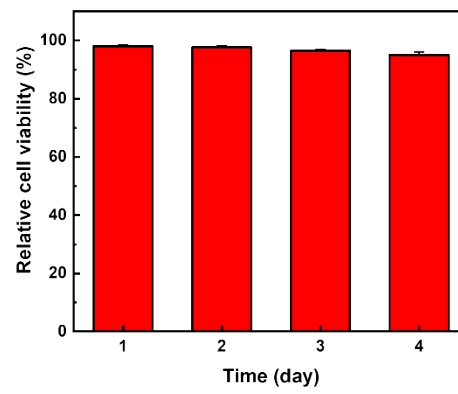

Fig. S1 The relative cell viability of HT-29 intestinal epithelial cells on the microchip during 4 days cultivation.

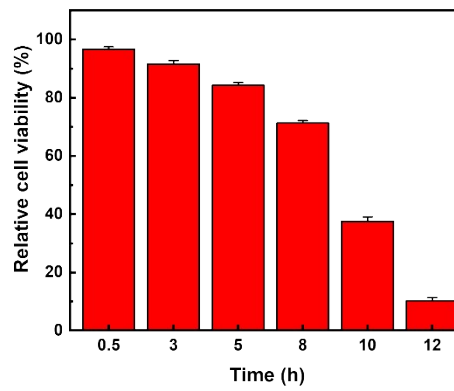

Fig. S2 The relative cell viability of HT-29 intestinal epithelial cells within 12 h when co-cultured with *S. typhimurium*
